# Supplementary material
Source: PubMed Central journal article supplement (PMC6348010)

**Figure S1**

**A**

| Patient ID | Size (cm) | Metas-tases | Grade | ER   | PR   | Her2 | Post-Menopause | Age | Subtype | BRCA Deficiency |
|------------|-----------|-------------|-------|------|------|------|----------------|-----|---------|-----------------|
| BC1        | 1         | 0           | 1     | 0.95 | 0.95 | -    | -              | 38  | Ductal  | Negative        |
| BC2        | 3         | 1           | 2     | 0.9  | 0.1  | -    | +              | 60  | Ductal  | Unknown         |
| BC3        | 1.5       | 0           | 3     | 0    | 0    | -    | -              | 43  | Ductal  | Negative        |
| BC4        | 2.1       | 1           | 1     | 0.95 | 0.95 | -    | -              | 52  | Ductal  | Negative        |
| BC5        | 2         | 0           | 3     | 0.05 | 0.01 | -    | +              | 78  | Ductal  | Unknown         |
| BC6        | 1.3       | 0           | 2     | 0.99 | 0.01 | -    | +              | 58  | Ductal  | Unknown         |
| BC7        | 1.2       | 0           | 3     | 0    | 0    | +    | +              | 65  | Ductal  | Unknown         |
| BC8        | 1.3       | 0           | 2     | 0.2  | 0.05 | -    | +              | 72  | Ductal  | Unknown         |

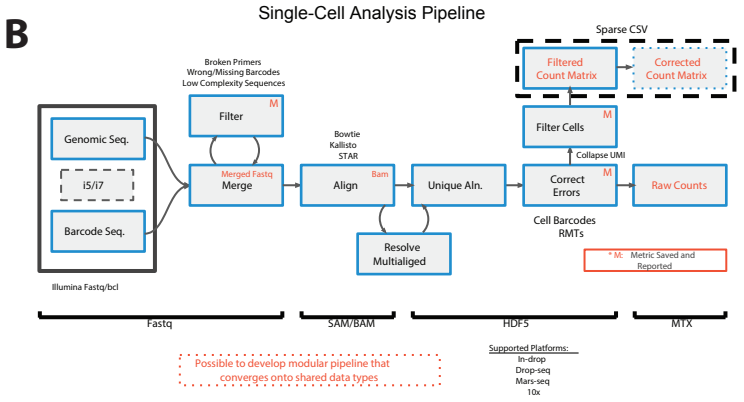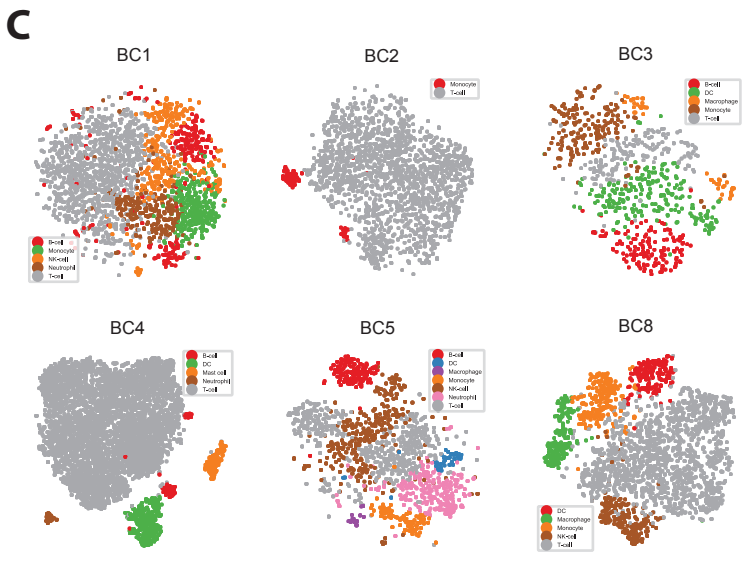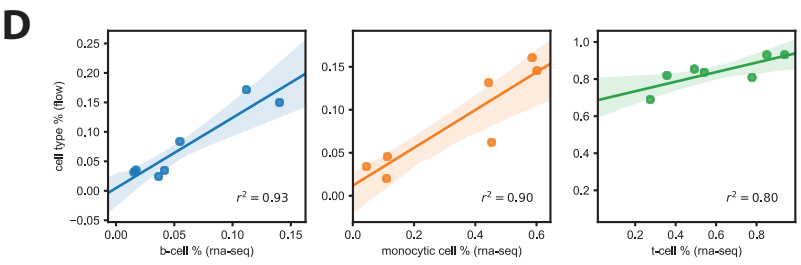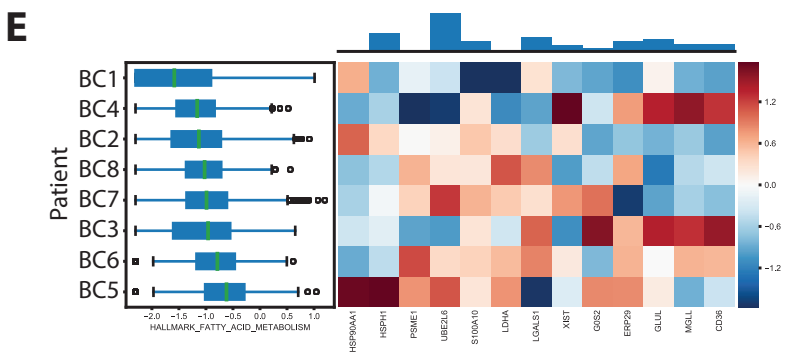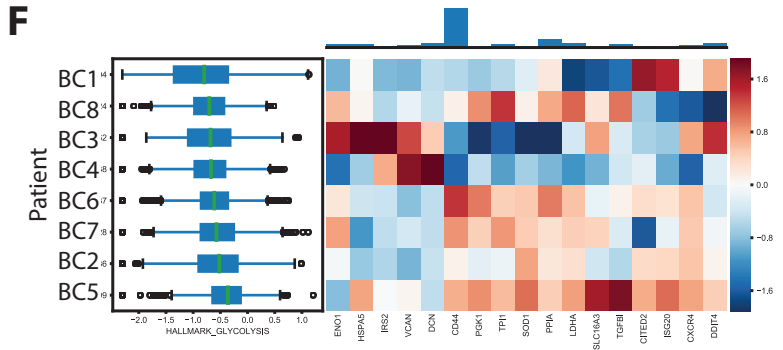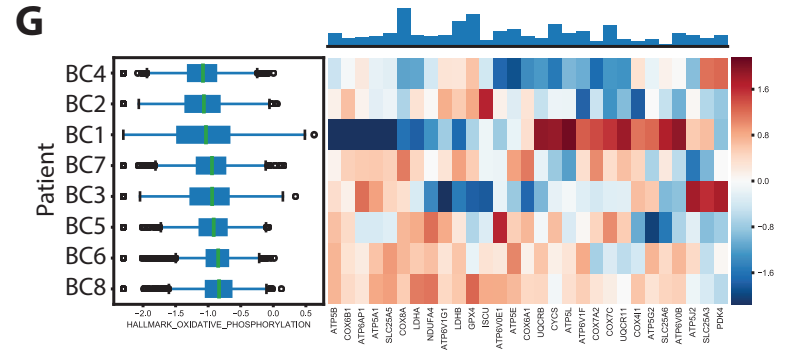

Supplement: NIHMS977868-supplement-1.pdf [file NIHMS977868-supplement-1.pdf]
