# Supplementary material
Source: PubMed Central journal article supplement (PMC6348010)

**Figure S2**

**A**

Posterior probability of assignment of cells to clusters

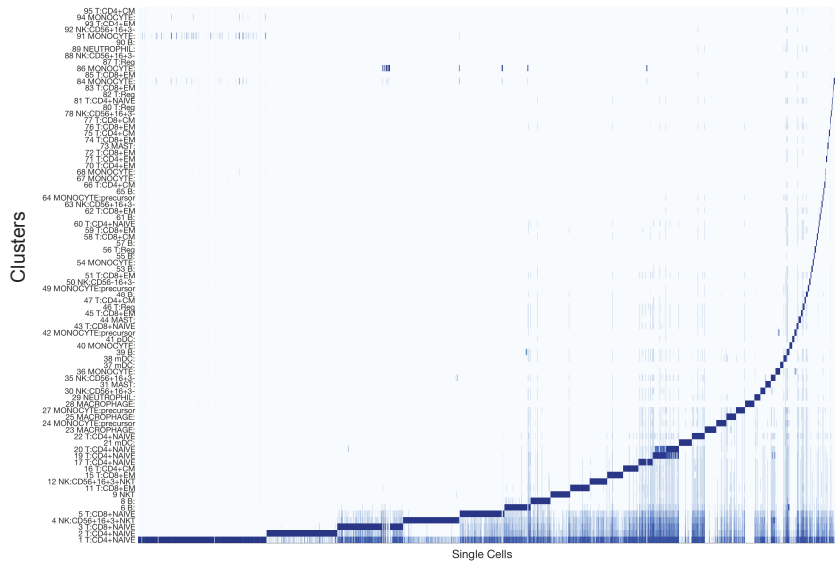

**B**

Bhattacharyya Distances between pairs of clusters

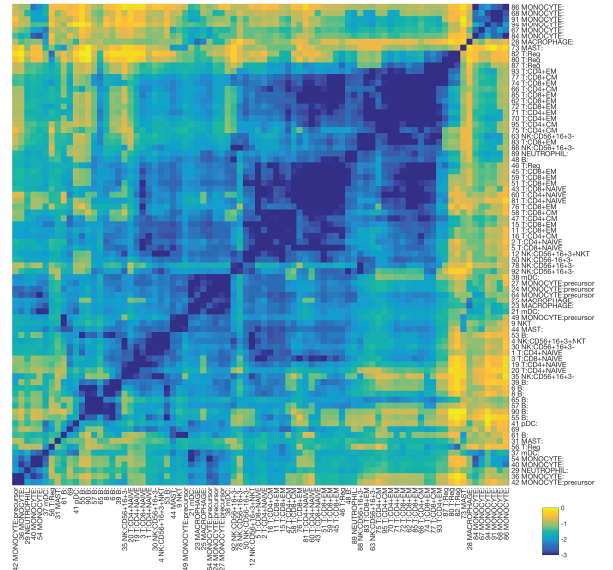

**C**

10-fold cross validation

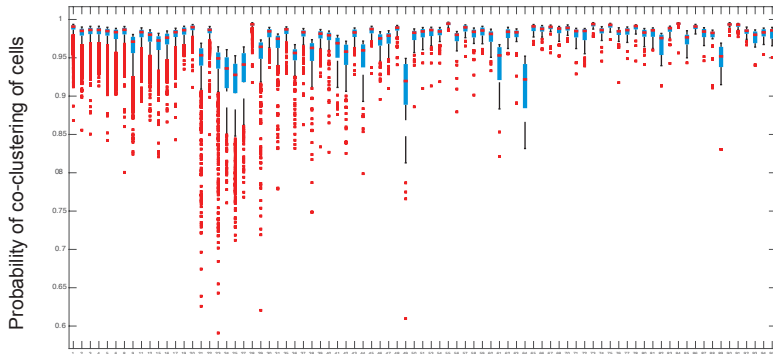

leave one patient out

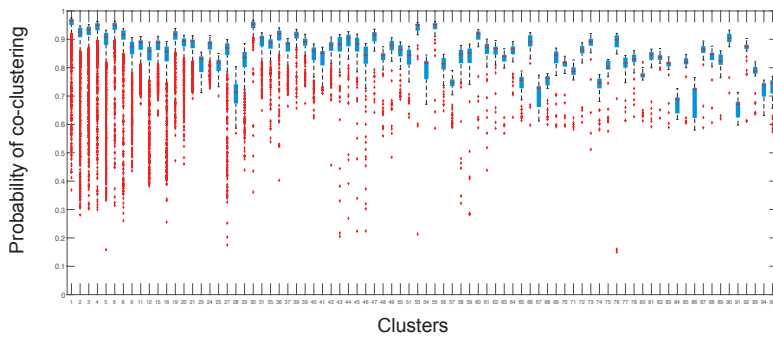

**D**

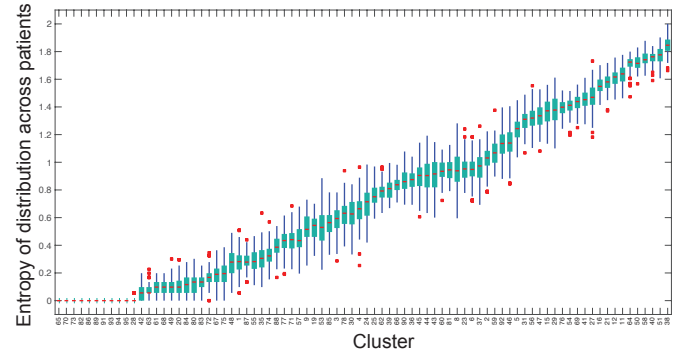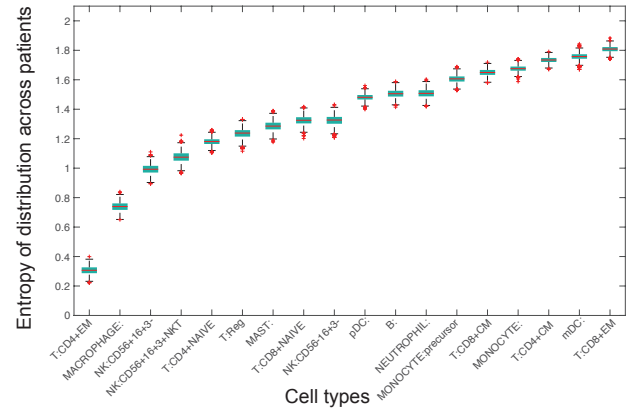

**E**

Pairwise distance between clusters

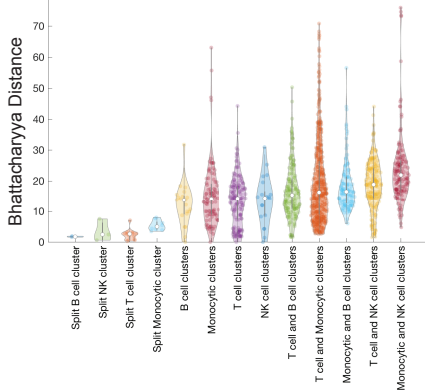

**F**

Pairwise distance between clusters without mean

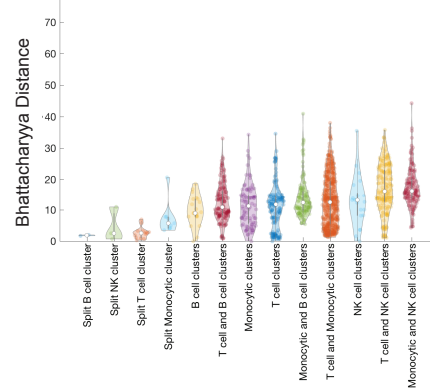

**G**

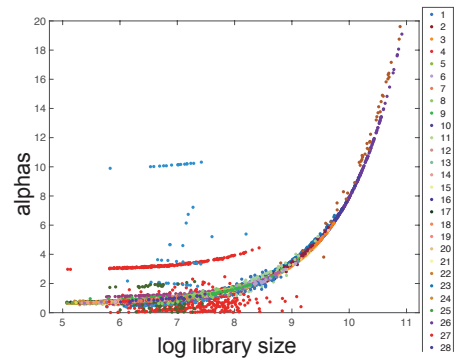

**H**

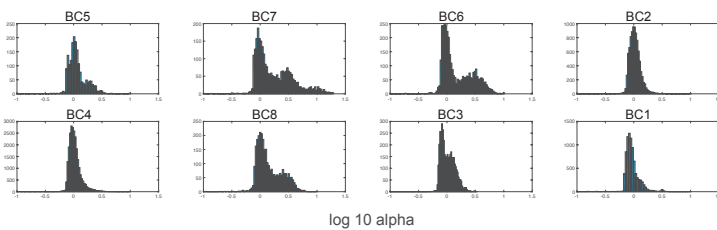

**I**

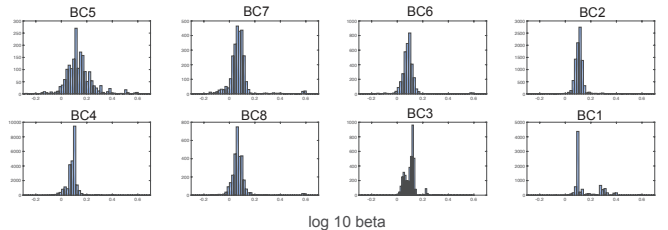

Supplement: NIHMS977868-supplement-2.pdf [file NIHMS977868-supplement-2.pdf]
