# Supplementary material
Source: PubMed Central journal article supplement (PMC6348010)
Supplement: NIHMS977868-supplement-3.pdf [file NIHMS977868-supplement-3.pdf]

Figure S3

A

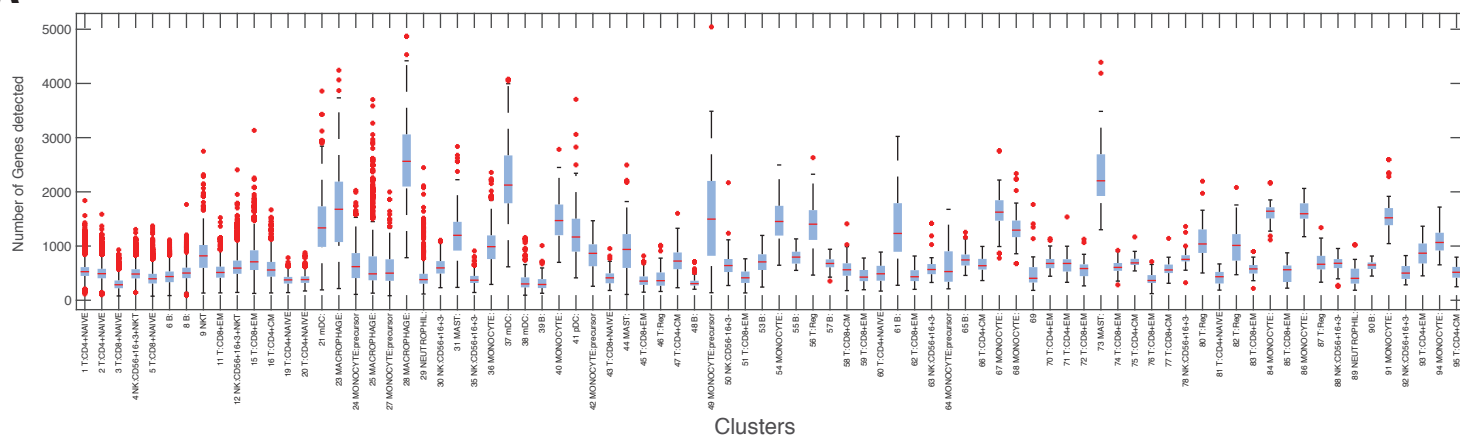

B

Tumor - Normal Variance Enrichments: NK cells

|                           | set size | enrichment score | fdR q-val |
|---------------------------|----------|------------------|-----------|
| Oxidative Phosphorylation | 196      | 6.007957         | 0.0       |
| Interferon Gamma Response | 196      | 5.730341         | 0.0       |
| Apoptosis                 | 154      | 5.425722         | 0.0       |
| Tnfa Signaling Via Nfkb   | 195      | 5.340952         | 0.0       |
| Interferon Alpha Response | 94       | 4.657201         | 0.0       |
| Tgf Beta Signaling        | 53       | 3.071116         | 0.0       |

C

Tumor - Normal Variance Enrichments: Monocytic cells

|                           | set size | enrichment score | fdR q-val |
|---------------------------|----------|------------------|-----------|
| Oxidative Phosphorylation | 196.0    | 6.007957         | 0.000000  |
| Interferon Gamma Response | 196.0    | 5.730341         | 0.000000  |
| Tnfa Signaling Via Nfkb   | 195.0    | 5.340952         | 0.000000  |
| Interferon Alpha Response | 94.0     | 4.657201         | 0.000000  |
| Tgf Beta Signaling        | 53.0     | 3.071116         | 0.000000  |
| Mitotic Spindle           | 199.0    | 2.924059         | 0.000000  |
| Il2 Stat5 Signaling       | 192.0    | 2.663728         | 0.000263  |
| Il6 Jak Stat3 Signalingf  | NaN      | NaN              | NaN       |
