# Supplementary material
Source: PubMed Central journal article supplement (PMC6348010)

# Figure S6

**A**

| Patient ID | Size (cm) | Metastases | Grade | ER   | PR  | Her2 | Post Menopause | Age | Subtype | BRCA Deficiency |
|------------|-----------|------------|-------|------|-----|------|----------------|-----|---------|-----------------|
| BC9        | 1.7       | 0          | 2     | 0.95 | 0.8 | -    | +              | 65  | Lobular | Unknown         |
| BC10       | 1.5       | 0          | 3     | 0.15 | 0   | -    | +              | 73  | Ductal  | Negative        |
| BC11       | 2.2       | 0          | 3     | 0    | 0   | +    | +              | 50  | Ductal  | Unknown         |

**B**

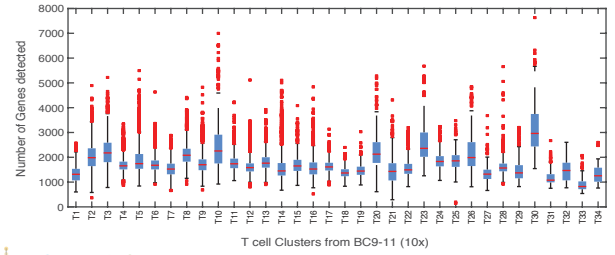

**C**

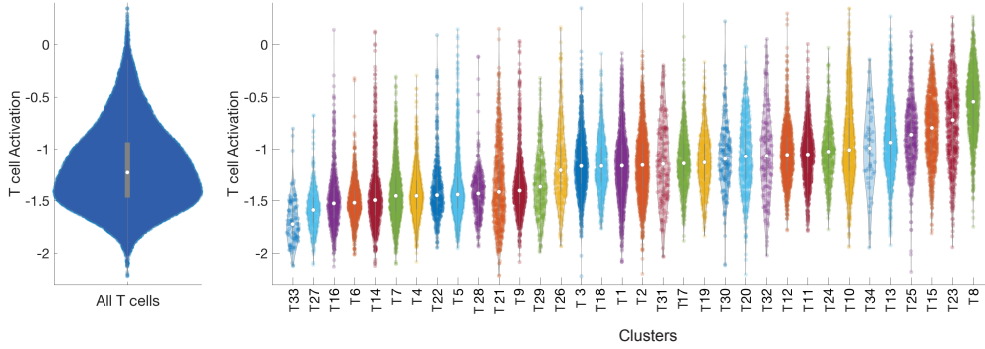

**D**

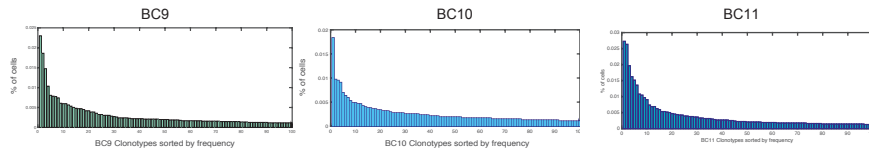

BC9

**F**

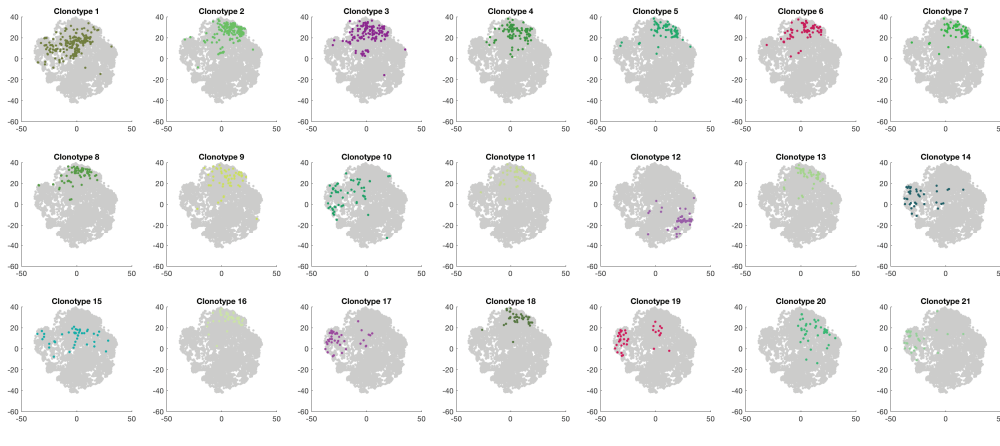

BC10

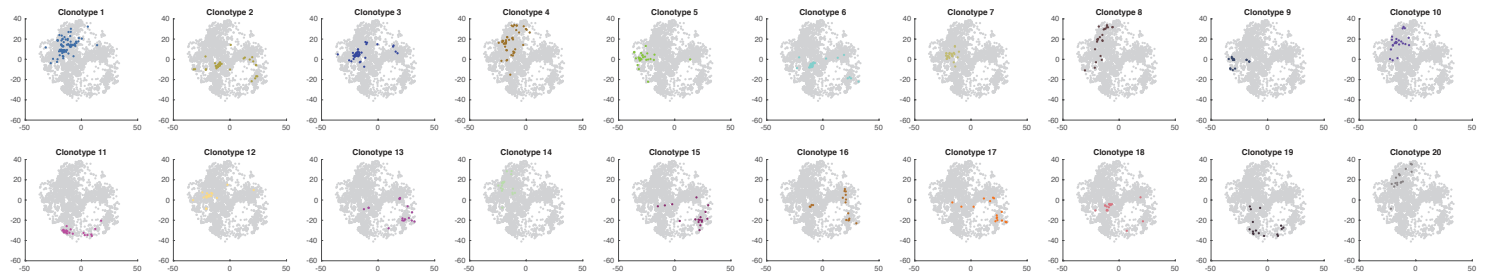

BC11

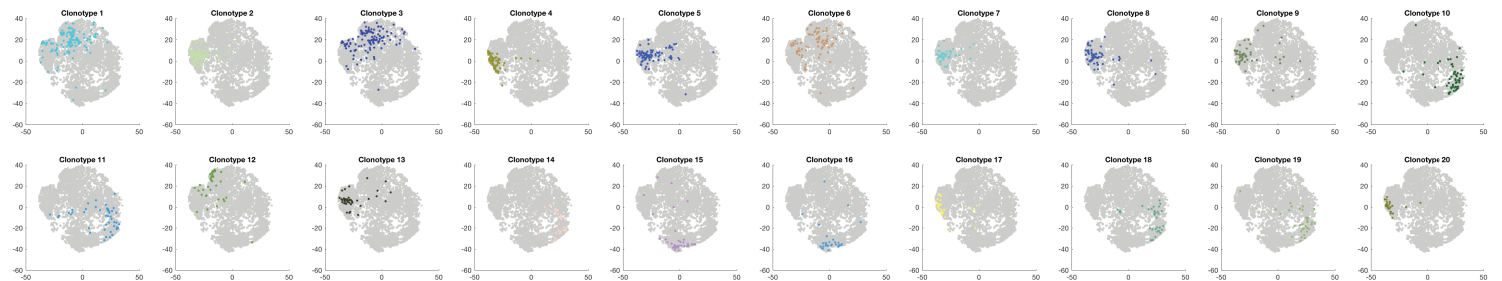

**E**

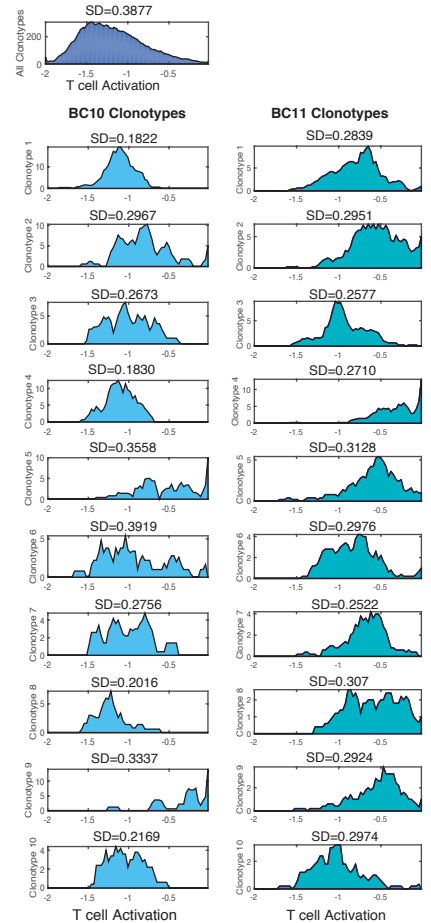

Supplement: NIHMS977868-supplement-6.pdf [file NIHMS977868-supplement-6.pdf]
