# Supplementary material
Source: PubMed Central journal article supplement (PMC6348010)

**Figure S4**

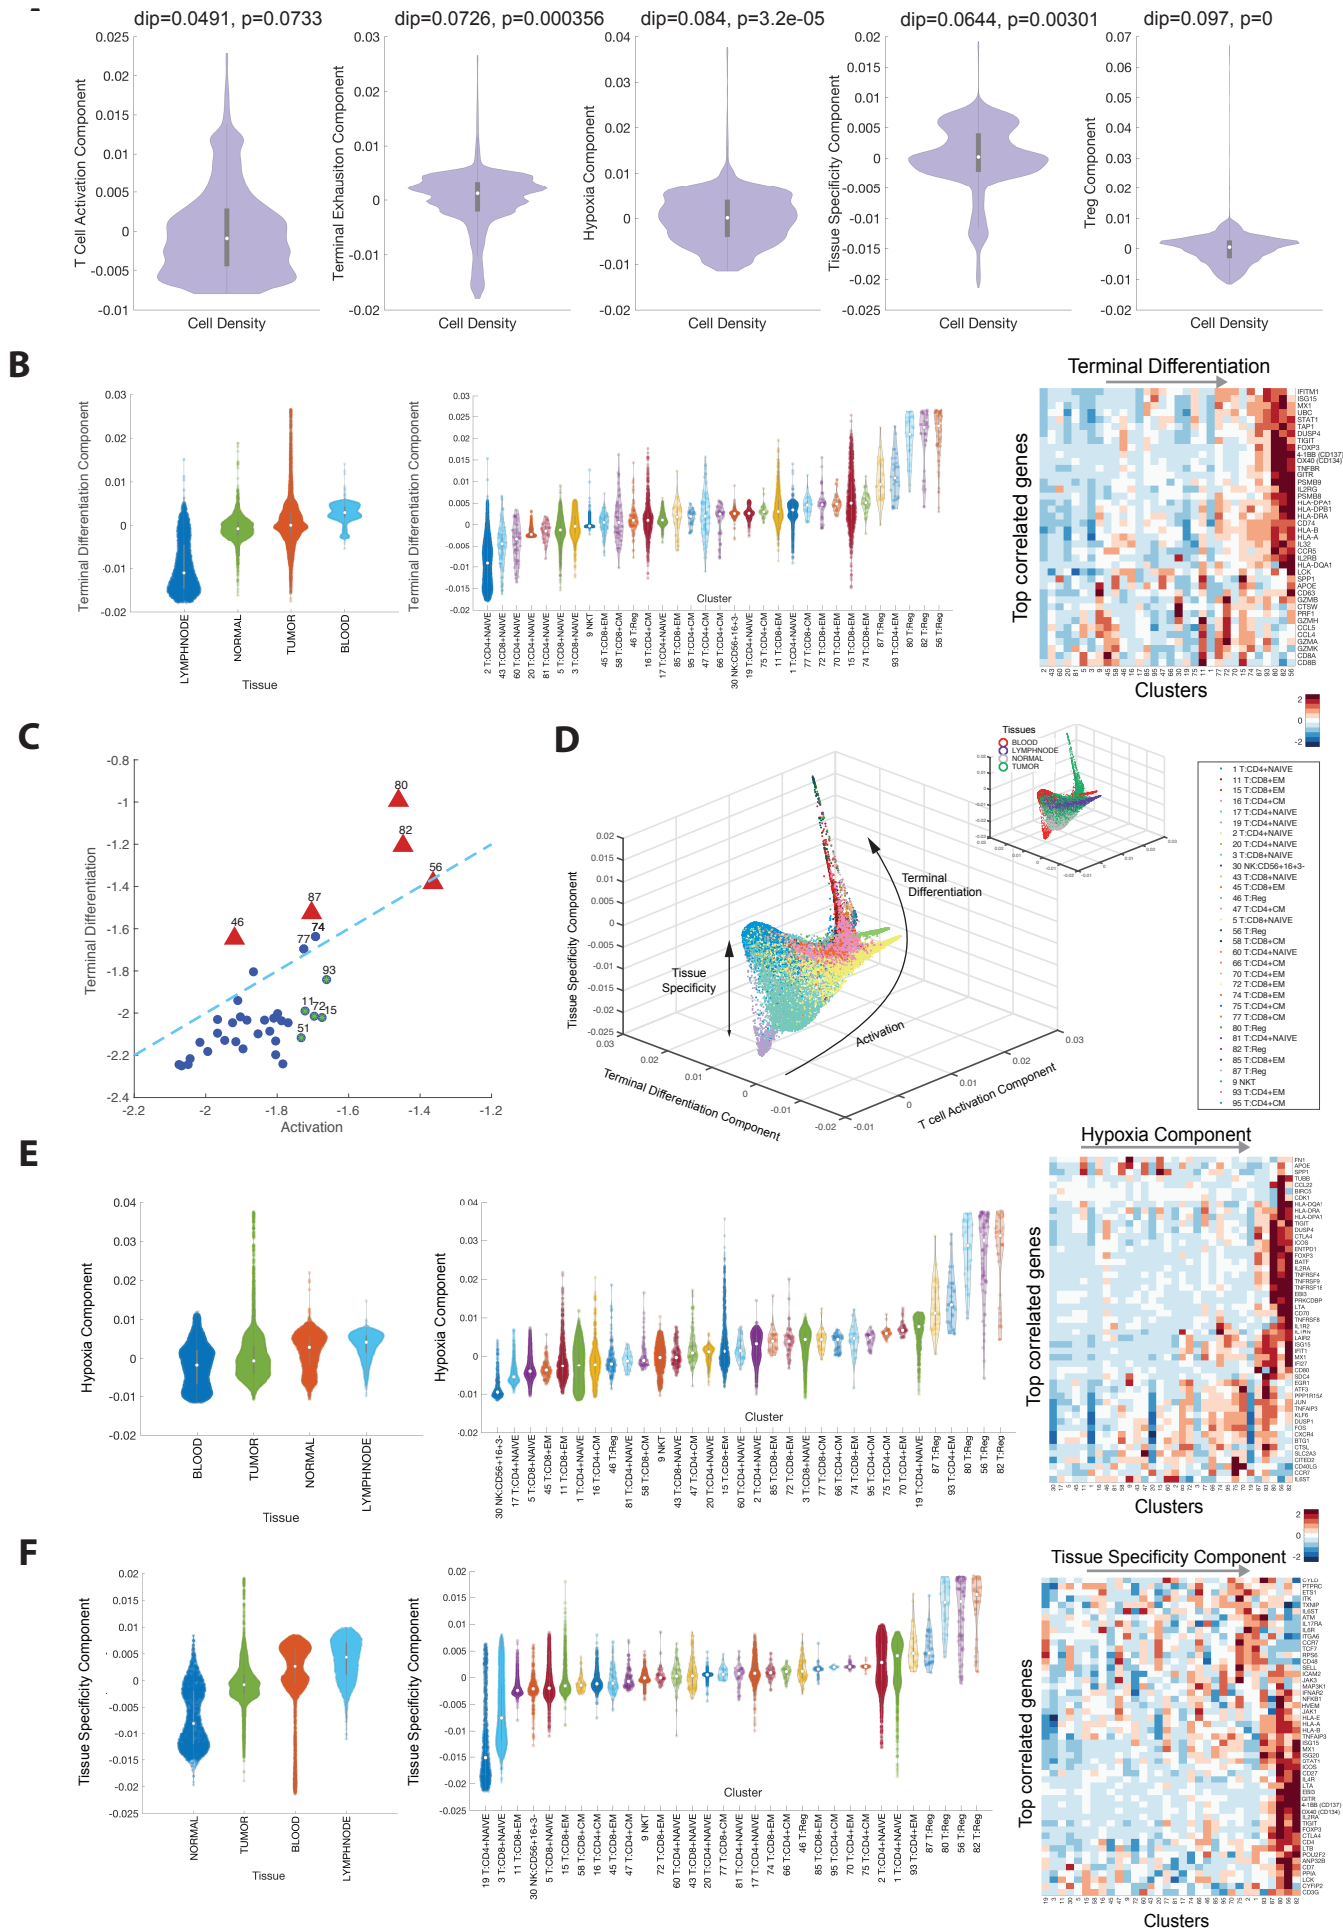

Supplement: NIHMS977868-supplement-4.pdf [file NIHMS977868-supplement-4.pdf]

**Figure S5**

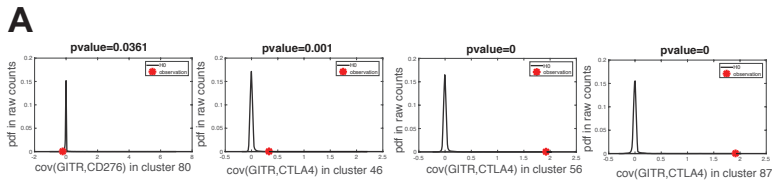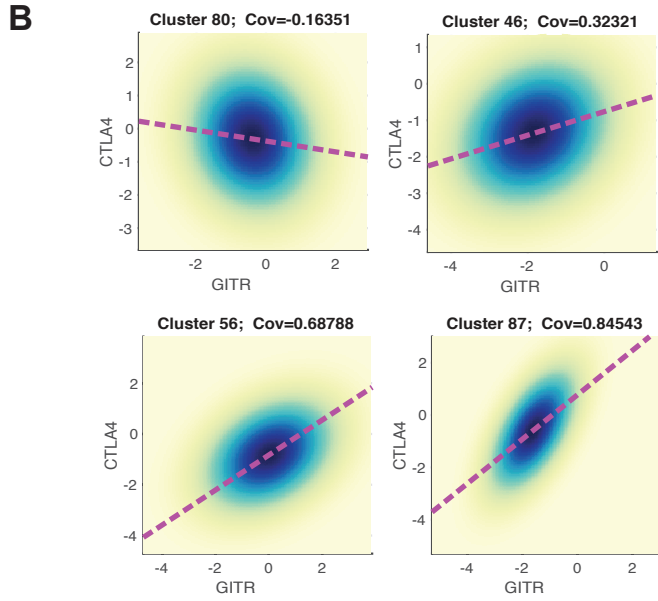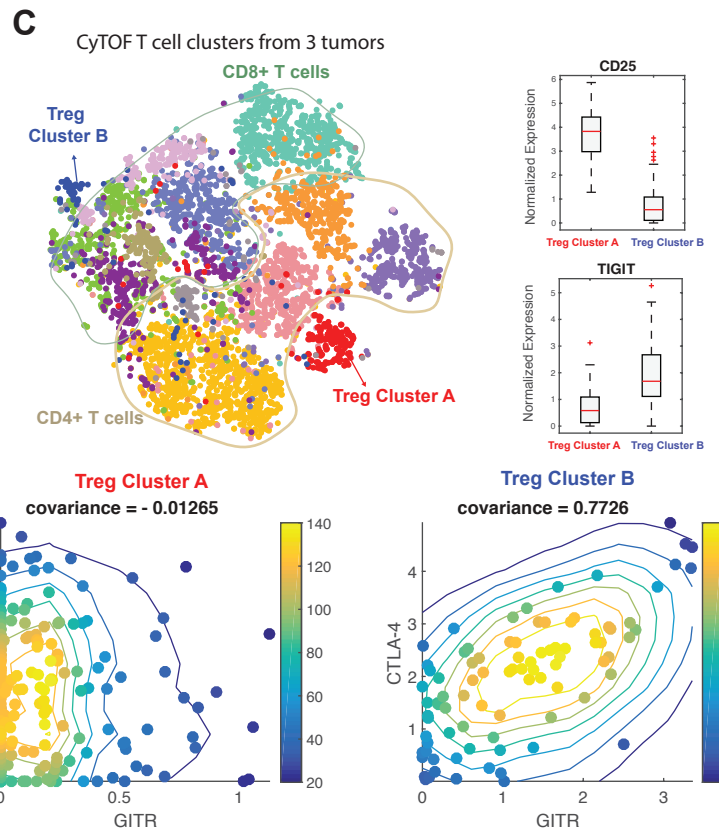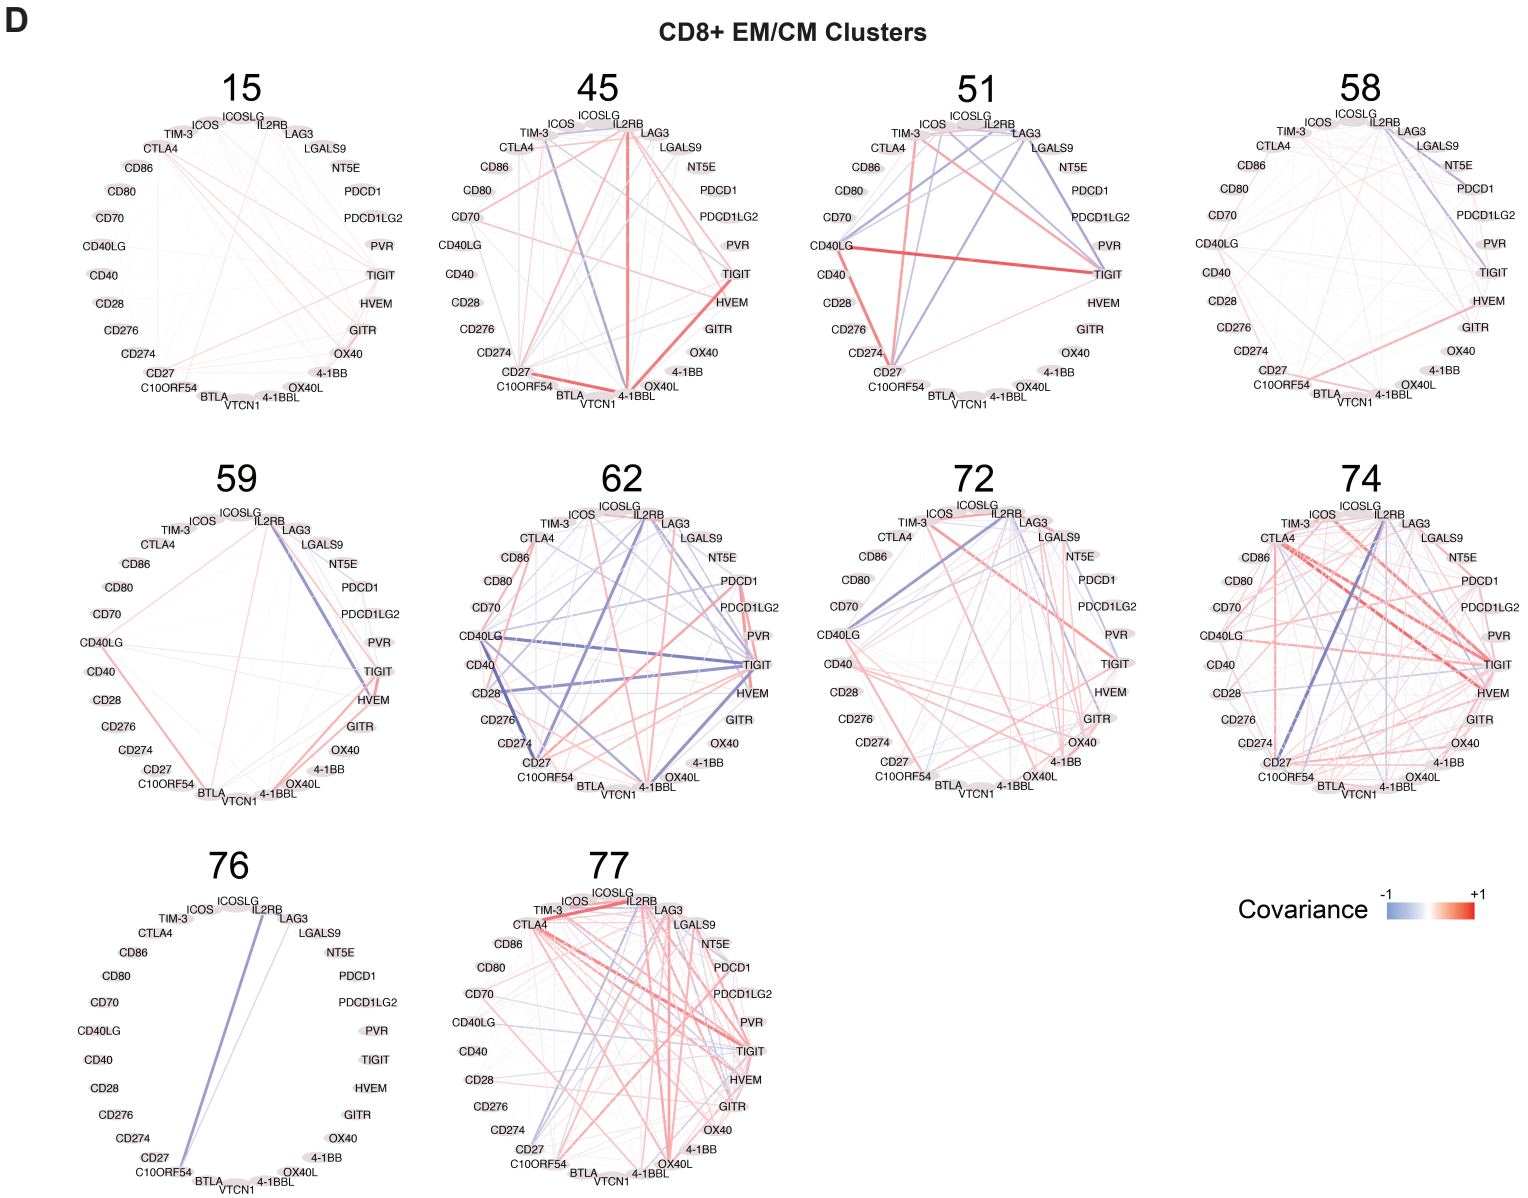

Supplement: NIHMS977868-supplement-5.pdf [file NIHMS977868-supplement-5.pdf]

**Figure S7**

**A**

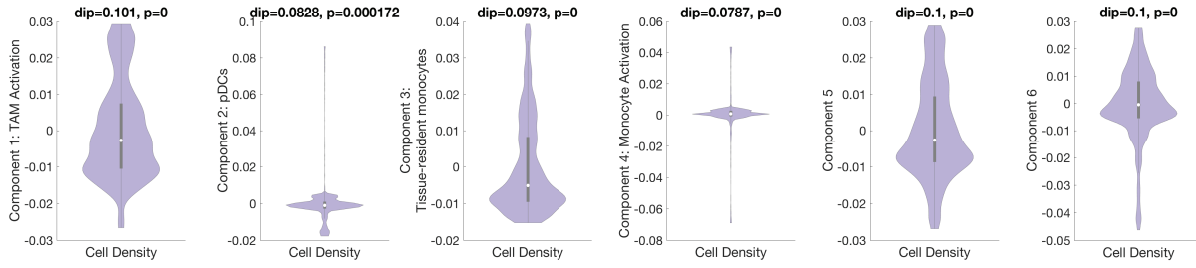

**B**

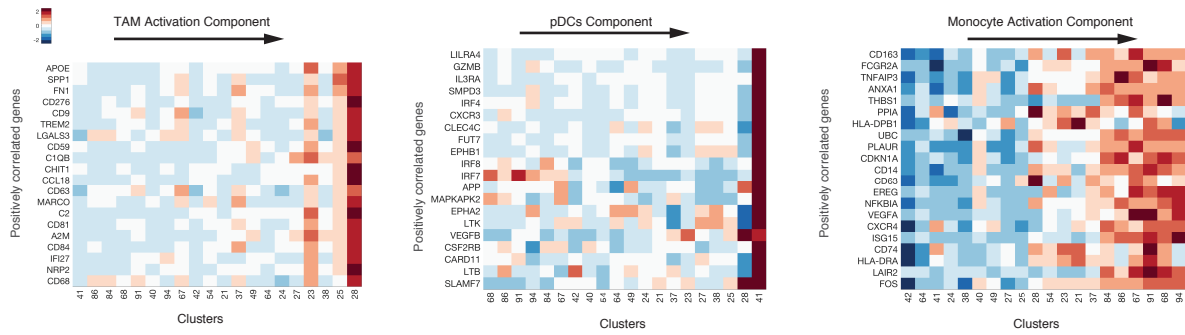

**C**

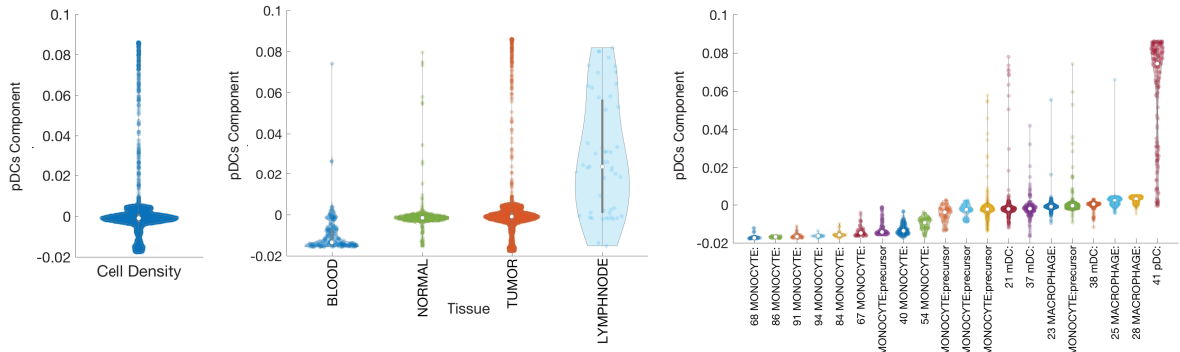

**D**

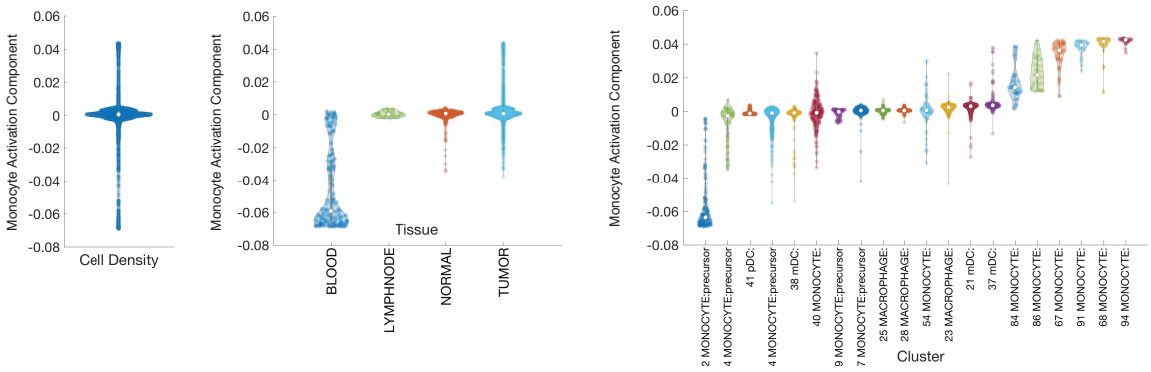

**E**

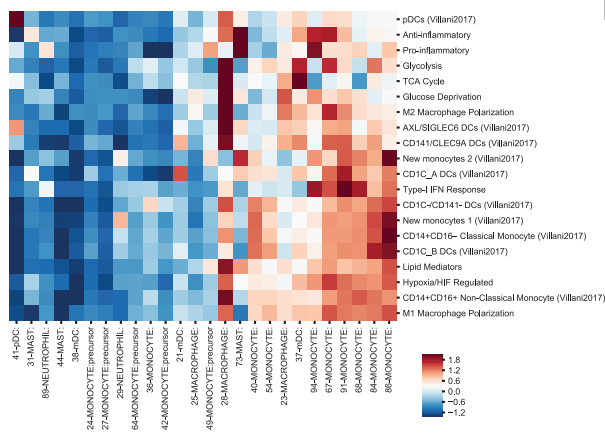

**F**

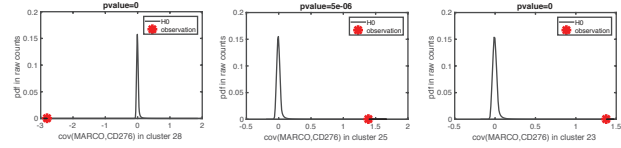

**G**

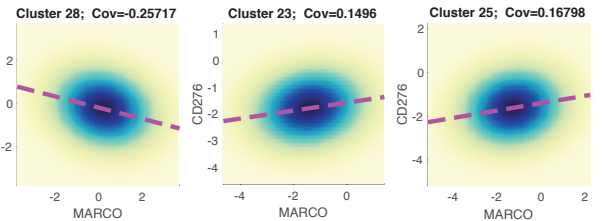

Supplement: NIHMS977868-supplement-7.pdf [file NIHMS977868-supplement-7.pdf]

# Figure S8

## SEQC

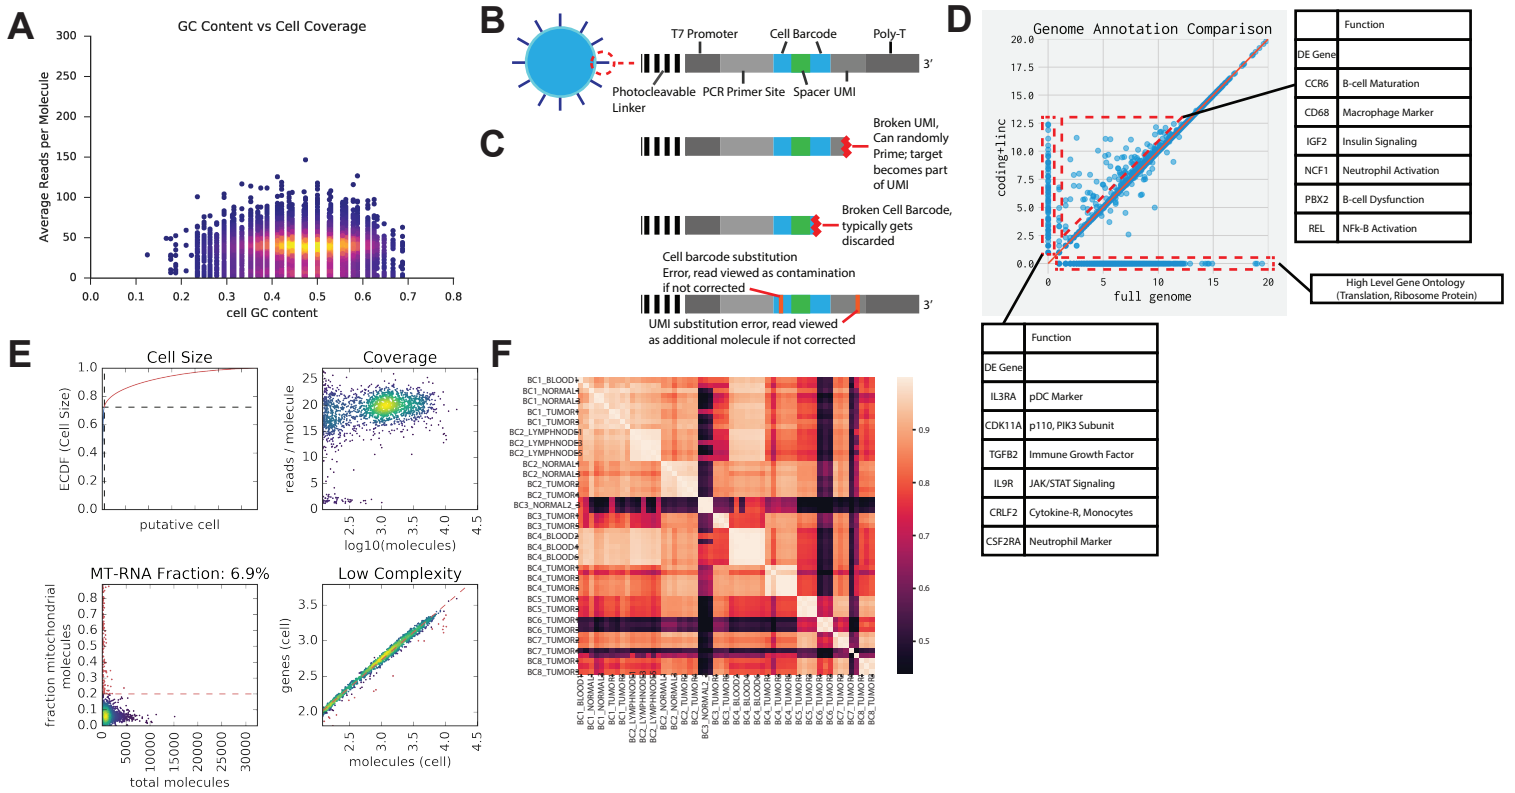

## Biscuit

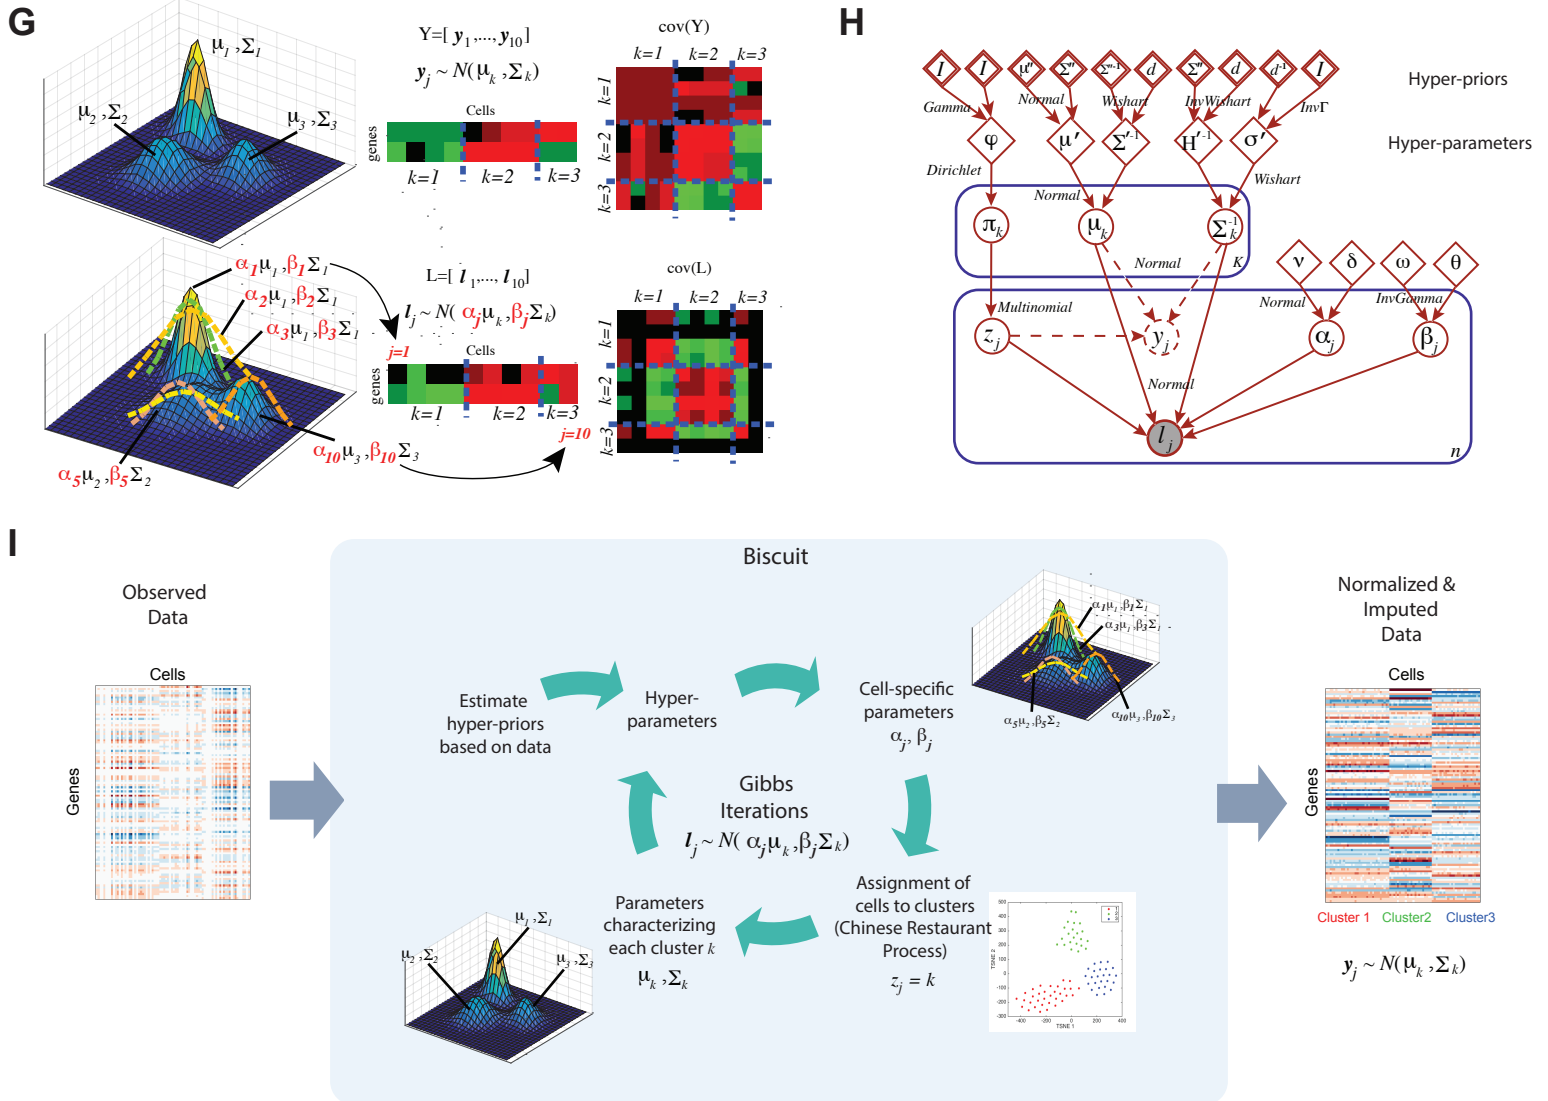

Supplement: NIHMS977868-supplement-8.pdf [file NIHMS977868-supplement-8.pdf]
